# Supplementary material for: Genetic structure of major depression symptoms across clinical and community cohorts
Source: PubMed Central journal article supplement (PMC10350129; doi:10.1101/2023.07.05.23292214), 2023-07-07
Supplement: NIHPP2023.07.05.23292214v1-supplement-2.pdf [file NIHPP2023.07.05.23292214v1-supplement-2.pdf]

## Supplementary text: Genetic structure of major depression symptoms in clinical and population cohorts

### Table of Contents

|                                                                                               |           |
|-----------------------------------------------------------------------------------------------|-----------|
| <b>Genotyping and QC</b> .....                                                                | <b>1</b>  |
| <b>Ethics statements</b> .....                                                                | <b>3</b>  |
| <b>Confirmatory factor analysis model schematics</b> .....                                    | <b>3</b>  |
| Supplementary Figure S1. Schematic drawings of the CFA models .....                           | 3         |
| <b>Symptom genetic correlations</b> .....                                                     | <b>6</b>  |
| Supplementary Figure S2. Genetic correlations between symptoms .....                          | 6         |
| Supplementary Figure S3. Model implied and residual proportions of genetic correlations ..... | 6         |
| <b>External phenotype summary statistics</b> .....                                            | <b>8</b>  |
| <b>Major Depressive Disorder Working Group of the Psychiatric Genomics Consortium</b> .....   | <b>9</b>  |
| <b>References</b> .....                                                                       | <b>25</b> |

### Genotyping and QC

**Psychiatric Genomics Consortium (PGC).** The analysis used data from 24 cohorts from the PGC MDD datasets that had symptom data on cases. Data was drawn from the following cohorts:

- BiDirect (bidi1)
- BOMA (boma)
- CoFams (cof3)
- PsyCoLaus (col3)
- GenRED (gens, grnd)
- GenPod/Newmeds (gcp3)
- GSK (gsk2)
- Janssen (janpy)
- MPIP/MARS (mmi2, mmo4)
- NESDA/NTR (nes1)
- QIMR (qi3c, qi6c, qio2)
- RADIANT (rad3, rage, rai2, rau2, rde4)
- Rotterdam (rot4)
- SHIP (shp0)
- STAR\*D (stm2)
- TwinGene (twg2)

The genotypes were processed through Ricopili (Lam et al., 2020) with the following QC: SNP missingness < 0.05; sample missingness < 0.02; autosomal heterozygosity deviation ( $|F_{het}| < 0.2$ ); and SNP Hardy-Weinberg equilibrium ( $P > 10^{-6}$  in controls,  $P > 10^{-10}$  in cases). QC'd genotypes were then imputed to the 1000 Genomes Reference Panel (The 1000 Genomes Project Consortium, 2015). Information on cohort genotyping and additional processing steps is available in (Wray et al., 2018).

**Australian Genetics of Depression Study (AGDS).** Genotyping was conducted using the Illumina Infinium Global Screening Array platform and QC'd for unknown or ambiguous map position and strand alignment, missingness >5%, HWE <  $1 \times 10^{-6}$ , MAF<1%. Genotypes were imputed to HRCr1.1. Individuals were excluded with missing rate > 3%, inconsistent sex, or if deemed ancestry outliers from the European population (6 standard deviations from the first two genetic principal components from 1000 Genomes). Imputed genotype dosages were used for the analyses. GWAS was carried out in SAIGE (Zhou et al., 2018) using a generalized linear mixed model with genotyping batch and 10 PCs as covariates. Variants with MAF<1% and imputation accuracy score <0.7 were excluded.

**Avon Longitudinal Study of Parents and Children (ALSPAC).** ALSPAC children were genotyped using the Illumina HumanHap550 quad chip genotyping platforms. Individuals were excluded on the basis of gender mismatches; minimal or excessive heterozygosity; disproportionate levels of individual missingness (>3%) and insufficient sample replication (IBD < 0.8). Population stratification was assessed by multidimensional scaling analysis, removing samples that clustered outside the CEU HapMap2 population. SNPs with a minor allele frequency of < 1%, a call rate of < 95% or evidence for violations of Hardy-Weinberg equilibrium ( $P < 5E-7$ ) were removed. Cryptic relatedness was measured as proportion of identity by descent (IBD > 0.1). Related subjects that passed all other quality control thresholds were retained during subsequent phasing and imputation. 9,115 subjects and 500,527 SNPs passed these quality control filters. Imputation of the target data was performed using Impute V2.2.2 against 1000 genomes reference panel (Phase 1, Version 3) (all polymorphic SNPs excluding singletons), using all 2186 reference haplotypes (including non-Europeans). This resulted in 28,699,419 SNPs, with 8,282,911 SNPs with a MAF >0.01 and info score of >0.8. Analysis were conducted using SNPTEST v2.5.2, adjusting for sex and the first 10 principal components of ancestry.

**Generation Scotland (GS:SFHS).** GWAS data was obtained using the Illumina OmniExpress array, and imputed using the Haplotype Research Consortium (HRC) dataset. Further details of methods here <https://pubmed.ncbi.nlm.nih.gov/28270201/>. GWAS was conducted in regenie with 4 PCs removing SNPs with MAC < 100, genotype missingness > 10%, INFO < 0.1, and HWE  $p > 1e-15$ .

**Estonian Biobank (EstBB).** The samples from the Estonian Biobank have been genotyped at the Genotyping Core Facility of the Institute of Genomics, University of Tartu using the Global Screening Array (GSAv1.0, GSAv2.0, and GSAv2.0\_EST) from Illumina. Altogether 155,772 samples have been genotyped and PLINK format files exported using GenomeStudio v2.0.4. Individuals were excluded from the analysis if their call-rate was <95% or if the sex defined based on heterozygosity of the X chromosome did not match the sex in the phenotype data. Variants were excluded if the call-rate was < 95% and HWE  $p$ -value <  $1e-4$  (autosomal variants only). Variant positions were updated to genome build 37 and all alleles were switched to the TOP strand using tools and reference files provided at <https://www.well.ox.ac.uk/~wrayner/strand/>. After QC the dataset contained 154,201 samples for imputation. Before imputation variants with MAF<1% and indels were removed. Prephasing was done using the Eagle v2.3 software. The number of conditioning haplotypes Eagle2 uses when phasing each sample was set to: --Kpbwt=20000. Imputation was done using Beagle v.28Sep18.793 with effective population size  $n_e=20,000$ . An Estonian population specific imputation reference of 2,297 WGS samples was used. The analysis was performed using the SAIGE software, including related individuals and adjusting for the first 10 principal components (PCs) of the genotype matrix, as well as for birth year, birth year squared and sex.

**UK Biobank (UKB).** Imputed genotypes were analysed from the version 3 release (Bycroft et al., 2018). Imputed genotypes were QC'd to INFO  $\geq 0.1$ , MAC  $\geq 100$ , HWE  $P > 1e-10$ , max alleles = 2, and duplicate markers removed. Association analysis was performed as a logistic regression in Plink2 (Chang et al., 2015) with genotyping array and 20 PCs as covariates.

### Ethics statements

Ethical approval was obtained from the ALSPAC Ethics and Law Committee and the local research ethics committees (project number B3118). Consent for biological samples has been collected in accordance with the Human Tissue Act (2004). GWAS data was generated by Sample Logistics and Genotyping Facilities at Wellcome Sanger Institute and LabCorp (Laboratory Corporation of America) using support from 23andMe.

All participants in AGDS provided informed consent that they had read and understood the study information sheets and to confirm that they would be willing to provide a saliva sample for genotyping and downstream generic analyses. All study protocols were approved by the QIMR Berghofer Medical Research Institute Human Research Ethics Committee - approval numbers P2118, P1309 and P2304.

The activities of the EstBB are regulated by the Human Genes Research Act, which was adopted in 2000 specifically for the operations of the EstBB. Individual-level data analysis in the EstBB was carried out under ethical approvals [1.1-12/2860 & 1.1-12/624] from the Estonian Committee on Bioethics and Human Research (Estonian Ministry of Social Affairs), using data according to the release application [3-10/GI-28207] from the Estonian Biobank.

Ethical approval for the GS:SFHS data collection was obtained from the Tayside Committee on Medical Research Ethics A (ref 05/S1401/89). Generation Scotland is currently approved as a Research Tissue Bank by the East of Scotland Research Ethics Service (ref 20/ES/0021).

UK Biobank received ethical approval from the Research Ethics Committee (reference 11/NW/0382).

### Confirmatory factor analysis model schematics

#### Supplementary Figure S1. Schematic drawings of the CFA models

Schematics to illustrate factor structures of the models that were tested. See main text Table 1 for symptom abbreviations and Supplementary Tables S4,6 for factor structures and coefficients.

Figure S1a: Model A: Common factor

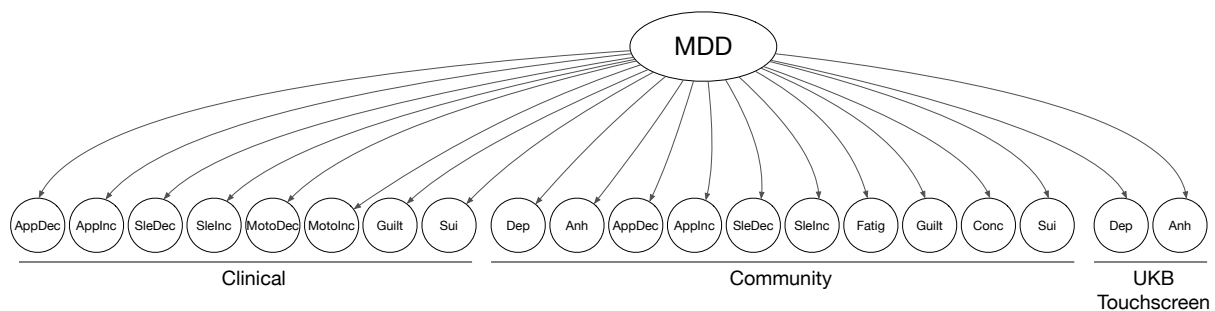

Figure S1b: Model B: Clinical and community factors

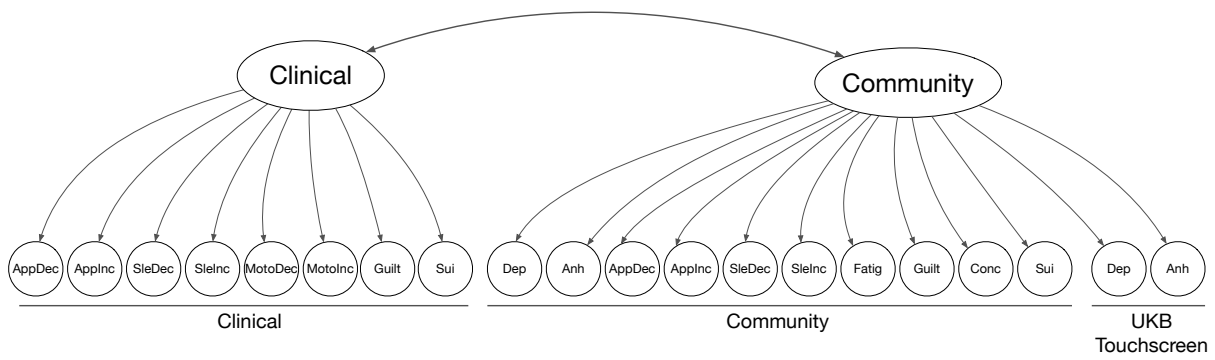

Figure S1c: Model C: Gating measurement factor

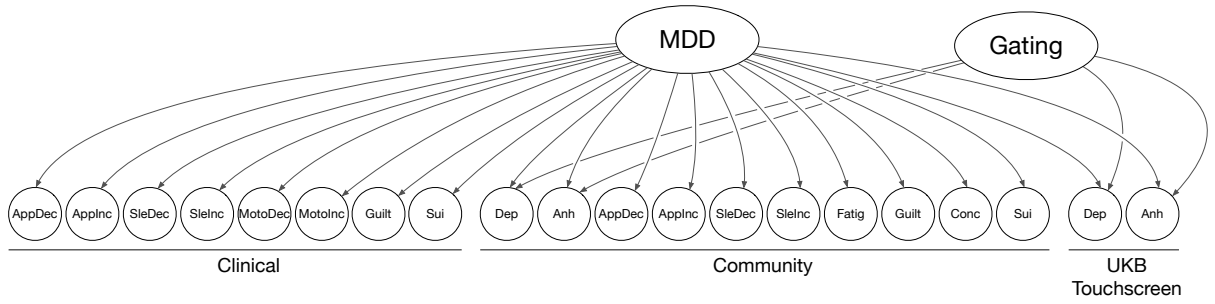

Figure S1d: Model D: Clinical-Community-Gating factors

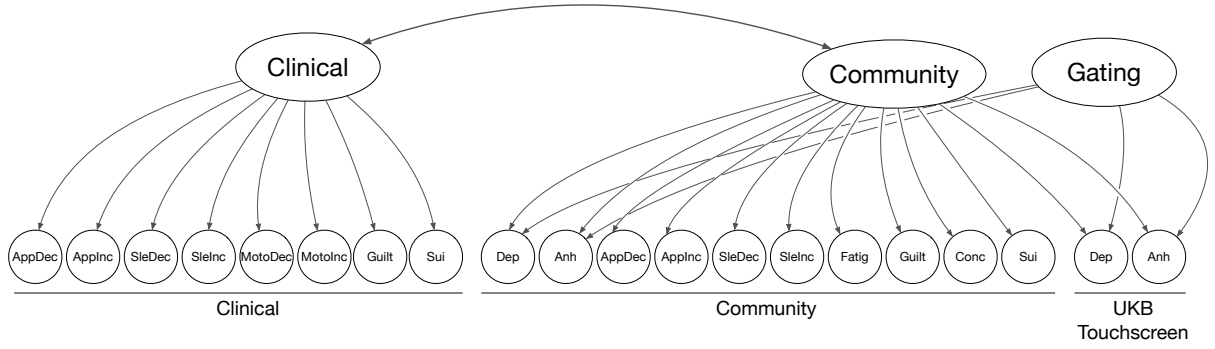

Figure S1e: Model E: Psychological-Somatic

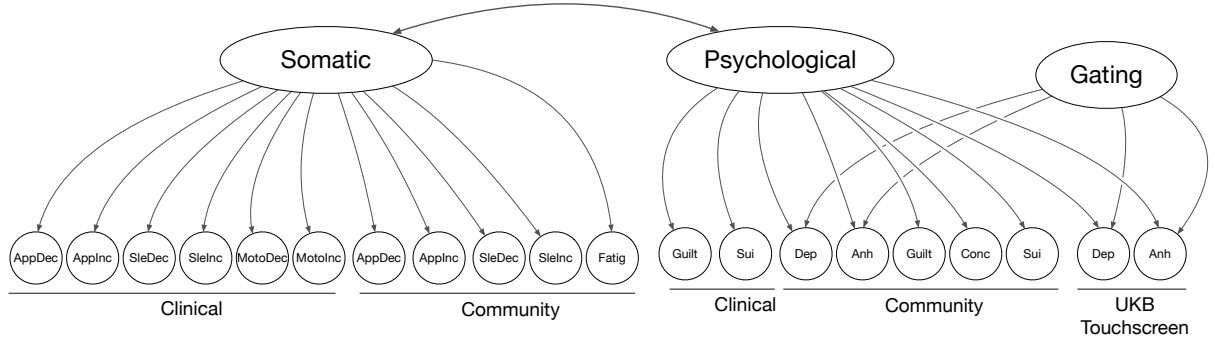

Figure S1f: Model F: Psychological- Neurovegetative

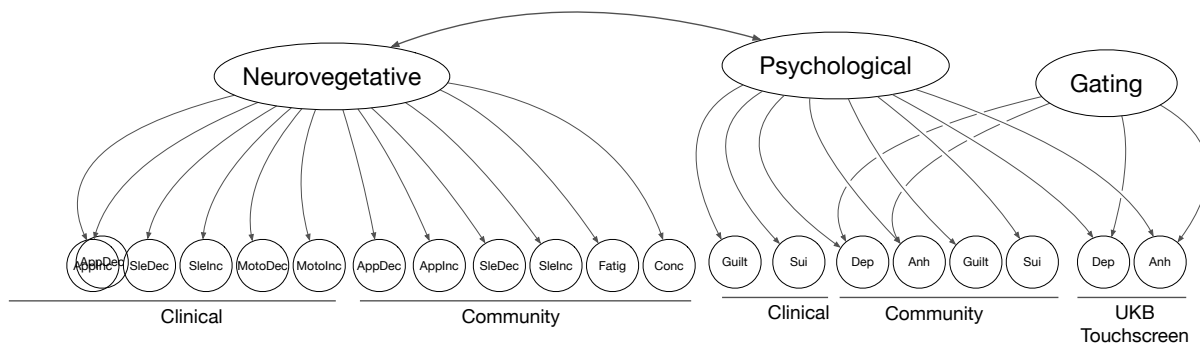

Figure S1g: Model G: Affective-Neurovegetative

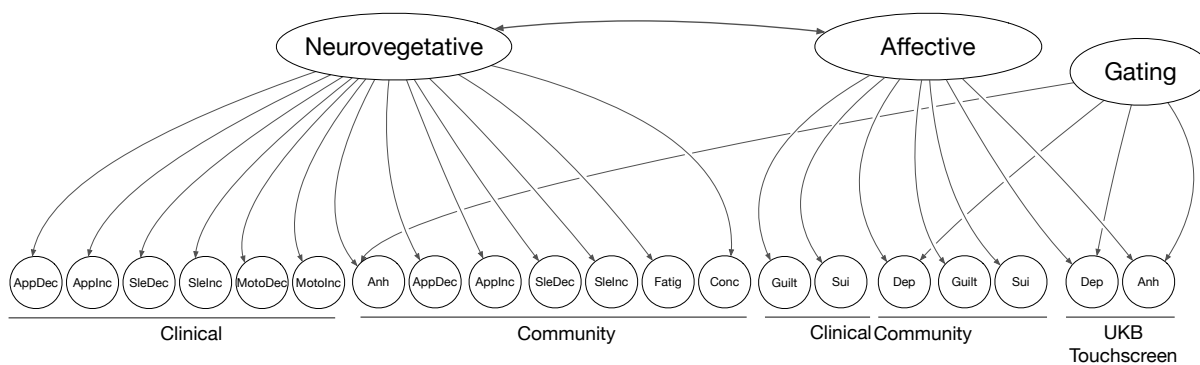

Figure S1h: Model H: Cognitive-Mood-Neurovegetative

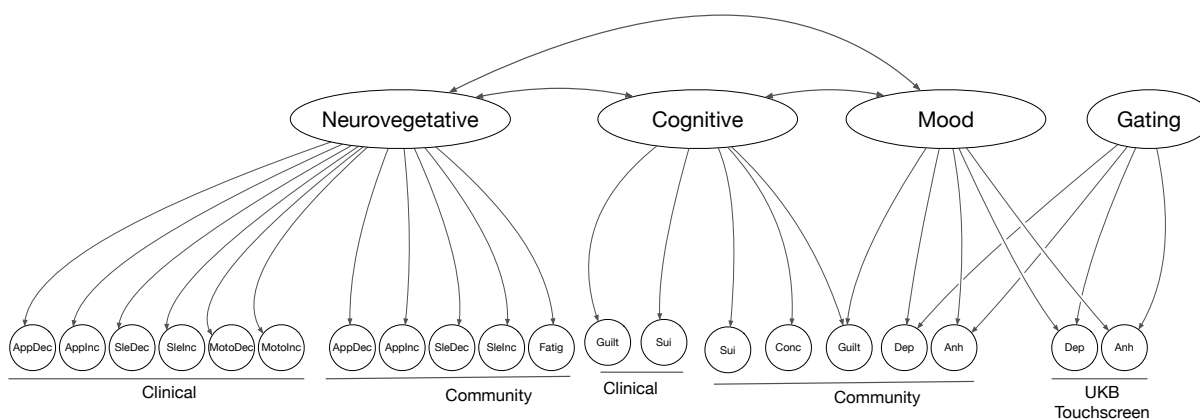

Figure S1i: Model I: Appetite-Vegetative-Cognitive/Mood

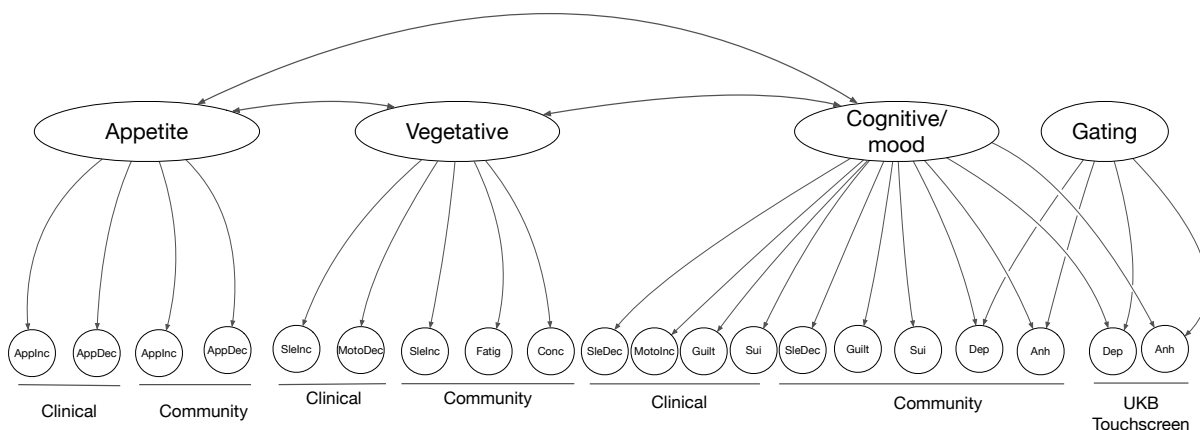

Figure S1j: Model J: Atypical-Melancholic-Affect/Cognitive

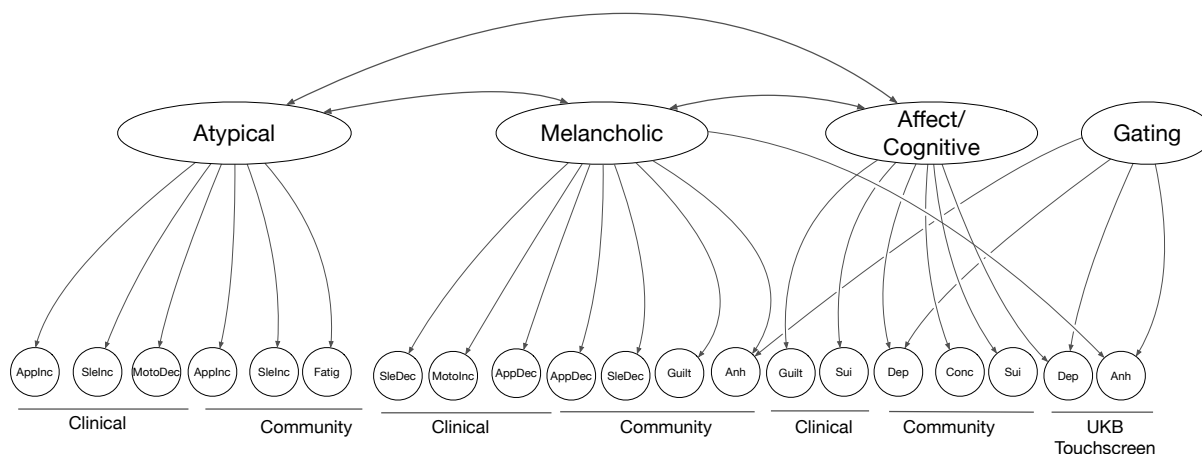

### Symptom genetic correlations

Supplementary Figure S2. Genetic correlations between symptoms

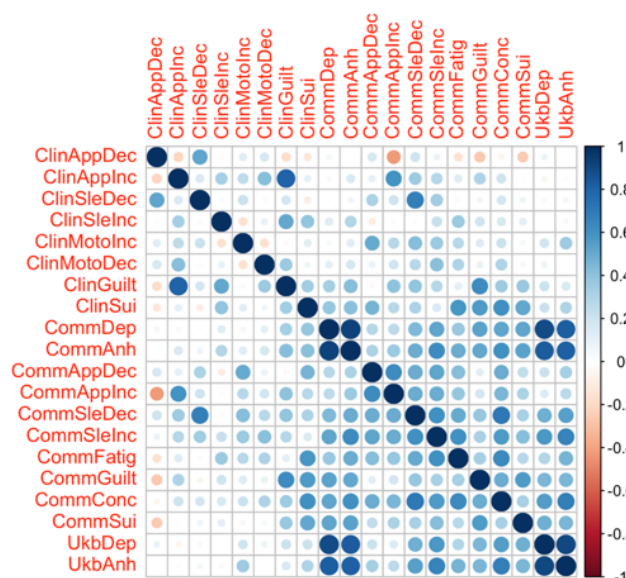

Supplementary Figure S3. Model implied and residual proportions of genetic correlations

Variance and covariances scaled by total genetic variance of each symptom.

Supplementary Figure S3a. Model implied proportions of genetic correlations for Clinical-Community-Gating factors (Model D)



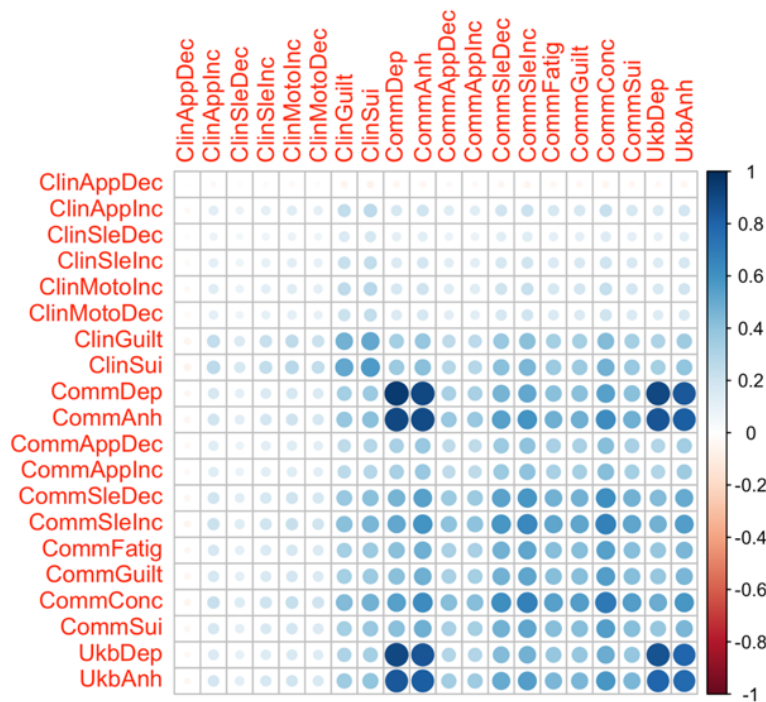

Supplementary Figure S3b. Model residual proportions of genetic correlations for Clinical-Community-Gating factors (Model D)

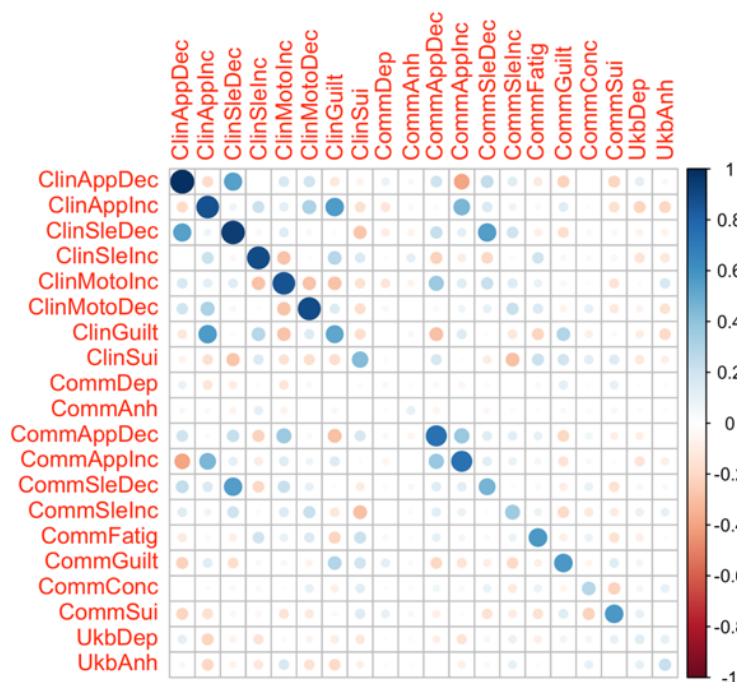

Supplementary Figure S3c. Model implied proportions of genetic correlations for Appetite-Vegetative-Cognitive/Mood factors (Model I)

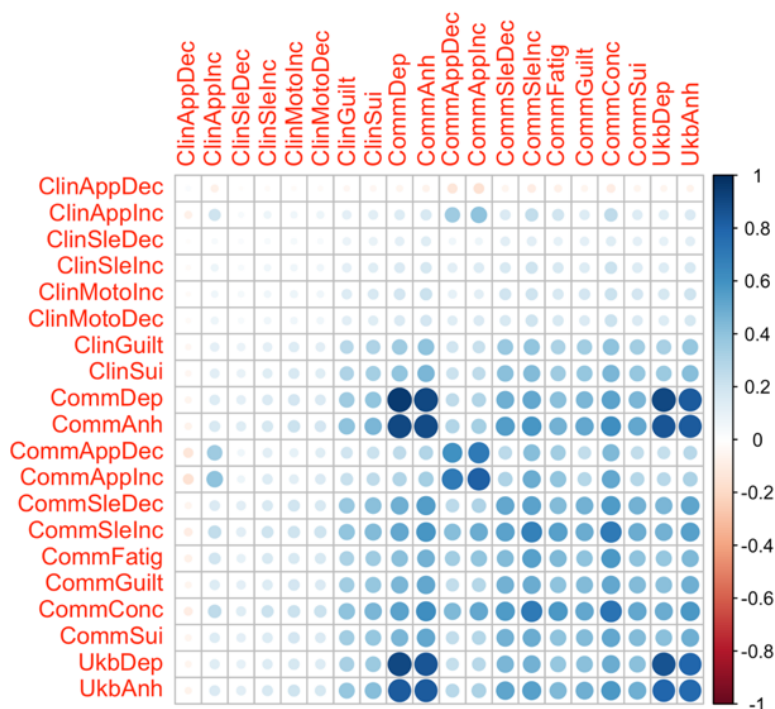

Supplementary Figure S3d. Model residual proportions of genetic correlations for Appetite-Vegetative-Cognitive/Mood factors (Model I)

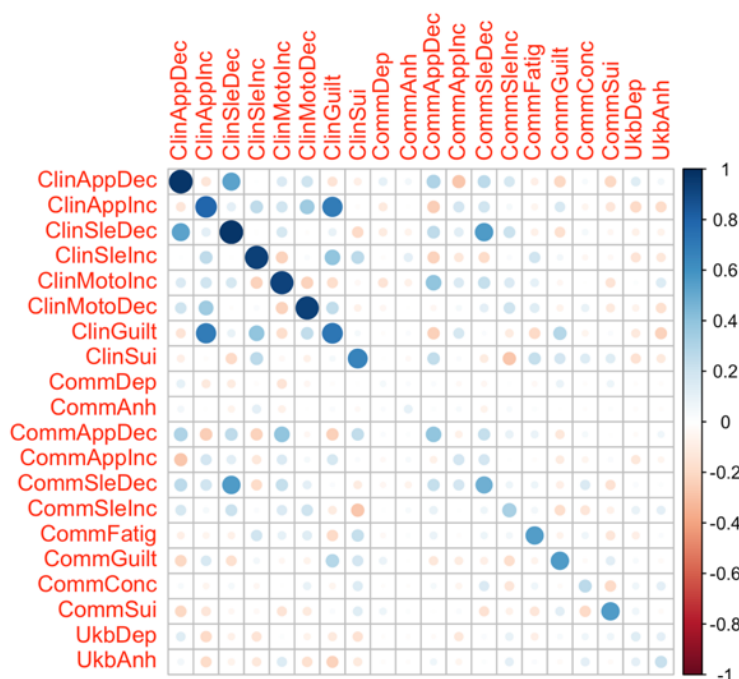

### External phenotype summary statistics

For the genetic multiple regression analysis, we used the following summary statistics:

- Alcohol dependence (Walters et al., 2018)
- Anxiety (Grotzinger et al., 2022)
- Bipolar disorder (Mullins et al., 2021)
- Body mass index (Pulit et al., 2019)



- Educational attainment (Okbay et al., 2022)
- Major depression (Als et al., 2022)
- Major depressive disorder (Wray et al., 2018)
- Neuroticism (Nagel et al., 2018)
- Pain (multisite chronic pain) (Johnston et al., 2019)
- Post-traumatic stress disorder (Nievergelt et al., 2019)
- Sleep (long sleep duration) (Dashti et al., 2018)
- Smoking (cigarettes per day) (Liu et al., 2019)

## Major Depressive Disorder Working Group of the Psychiatric Genomics Consortium

|                              |                           |                               |
|------------------------------|---------------------------|-------------------------------|
| Mark J Adams 1               | Jian Zeng 16              | Julia Boberg 36               |
| Fabian Streit 2              | Johan Zvrskovec 4, 8      | Sigrid Børte 51, 52, 53       |
| Swapnil Awasthi 3            | Dag Aarsland 26           | Emma Bränn 54                 |
| Brett N Adey 4               | Ky'Era V Actkins 27       | Alice Braun 55                |
| Karmel W Choi 5, 6           | Mazda Adli 3, 28          | Thorsten Brodersen 56         |
| V Kartik Chundru 7           | Esben Agerbo 12, 29, 30   | Søren Brunak 44               |
| Jonathan RI Coleman 4, 8     | Mareike Aichholzer 31     | Mie T Bruun 57                |
| Jerome C Foo 2               | Tracy M Air 32            | Pichit Buspavanich 58, 59     |
| Olga Giannakopoulou 9        | Allison Aiello 33         | Jonas Bybjerg-Grauholm 60, 61 |
| Alisha S M Hall 2, 10        | Thomas D Als 30, 34, 35   | Enda M Byrne 62               |
| Jens Hjerling-Leffler 11     | Evelyn Andersson 36       | Archie Campbell 63, 64        |
| David M Howard 4             | Till F M Andlauer 37, 38  | Megan L. Campbell 65          |
| Christopher Hübel 4, 12, 13  | Volker Arolt 39           | Enrique Castela 66            |
| Alex S F Kwong 1, 14         | Helga Ask 40, 41          | Jorge Cervilla 67, 68         |
| Bochao Danae Lin 15          | Sunita Badola 42          | Boris Chaumette 69            |
| Xiangrui Meng 9              | Clive Ballard 43          | Chia-Yen Chen 70              |
| Guiyan Ni 16                 | Karina Banasik 44         | Zhengming Chen 71, 72         |
| Oliver Pain 17               | Nicholas J Bass 9         | Sven Cichon 73, 74, 75, 76    |
| Gita A Pathak 18, 19         | Aartjan T F Beekman 45    | Lucía Colodro-Conde 24        |
| Eva C Schulte 20, 21, 22, 23 | Sintia Belangero 46       | Anne Corbett 43               |
| Jackson G Thorp 24           | Elisabeth B Binder 38, 47 | Elizabeth C Corfield 40, 77   |
| Alicia Walker 16             | Ottar Bjerkeset 48, 49    | Baptiste Couvy-Duchesne 78    |
| Shuyang Yao 25               | Gyda Bjornsdottir 50      |                               |

|                                    |                               |                                   |
|------------------------------------|-------------------------------|-----------------------------------|
| Nick Craddock 79, 80               | Robert C Free 108             | Marcus Ining 123                  |
| Udo Dannlowski 39                  | He Gao 109                    | Erkki Isometsä 124                |
| Gail Davies 81                     | Michael Gill 110              | Rick Jansen 45                    |
| EJC de Geus 82                     | Maria Gilles 87               | Yunxuan Jiang 125                 |
| Ian J Deary 81                     | Fernando S Goes 86            | Ian Jones 80                      |
| Franziska Degenhardt 76, 83        | Scott Douglas Gordon 24       | Lisa A Jones 126                  |
| Abbas Dehghan 84, 85               | Jakob Grove 30, 34, 35, 111   | Lina Jonsson 127                  |
| J Raymond DePaulo 86               | Daniel F Gudbjartsson 50, 112 | Robert Karlsson 25                |
| Michael Deuschle 87                | Blanca Gutierrez 67, 68       | Siegfried Kasper 128              |
| Maria Didriksen 88                 | Tim Hahn 39                   | Kenneth S Kendler 129             |
| Khoa Manh Dinh 89                  | Lynsey S Hall 80              | Ronald C Kessler 130              |
| Nese Direk 90                      | Thomas F Hansen 44, 60, 113   | Stefan Kloiber 101, 123, 131, 132 |
| Srdjan Djurovic 91, 92             | Magnus Haraldsson 114         | James A Knowles 133               |
| Anna R Docherty 93, 94, 95         | Catherina A Hartman 115       | Nastassja Koen 65                 |
| Katharina Domschke 96              | Alexandra Havdahl 40          | Julia Kraft 55                    |
| Joseph Dowsett 88                  | Caroline Hayward 116          | Henry R Kranzler 134, 135         |
| Ole Kristian Drange 49, 97, 98, 99 | Stefanie Heilmann-Heimbach 76 | Kristi Krebs 136                  |
| Erin C Dunn 6, 100                 | Stefan Herms 74, 76           | Theodora Kunovac Kallak 137       |
| Gudmundur Einarsson 50             | Ian B Hickie 117              | Zoltán Kutalik 138, 139, 140      |
| Thalia C Eley 4                    | Henrik Hjalgrim 118           | Elisa Lahtela 141                 |
| Samar S M Elsheikh 101             | Per Hoffmann 74, 76           | Margit Hørup Larsen 88            |
| Jan Engelmann 102                  | Georg Homuth 119              | Eric J Lenze 142                  |
| Michael E Benros 60, 103, 104      | Carsten Horn 120              | Daniel F Levey 143, 144           |
| Christian Erikstrup 89             | Jouke-Jan Hottenga 82         | Melissa Lewins 1                  |
| Valentina Escott-Price 80          | David M Hougaard 60, 61       | Glyn Lewis 9                      |
| Chiara Fabbri 4, 105               | Iiris Hovatta 121             | Liming Li 145, 146                |
| Yu Fang 106                        | Qin Qin Huang 7               | Kuang Lin 71                      |
| Sarah Finer 107                    | Floris Huider 82              | Penelope A Lind 24                |
| Josef Frank 2                      | Karen A Hunt 122              | Donald J MacIntyre 1, 147, 148    |

|                                  |                                      |                             |
|----------------------------------|--------------------------------------|-----------------------------|
| Dean F MacKinnon 86              | Sisse Rye Ostrowski 88, 166          | Daniel J Smith 185          |
| Wolfgang Maier 149               | Vanessa K Ota 46                     | Erik Sørensen 88            |
| Victoria S Marshe 101, 150       | Michael J Owen 80                    | Sundararajan Srinivasan 186 |
| Hamdi Mbarek 82                  | Richard Packer 167                   | Hreinn Stefansson 50        |
| Peter McGuffin 4                 | Teemu Palviainen 141                 | Kari Stefansson 50, 187     |
| Sarah E Medland 24               | Pedro M Pan 168                      | Dan J. Stein 188            |
| Susanne Meinert 39, 151          | Carlos N Pato 169                    | Frederike Stein 189         |
| Susan Mikkelsen 89               | Michele T Pato 169                   | André Tadic 102, 190        |
| Christina Mikkelsen 88, 152      | Nancy L Pedersen 25                  | Henning Teismann 191        |
| Yuri Milaneschi 45               | Ole Birger Pedersen 170              | Alexander Teumer 192        |
| Iona Y Millwood 71, 72           | Roseann E Peterson 129, 171          | Anita Thapar 80, 193        |
| Brittany L Mitchell 24           | Wouter J Peyrot 45                   | Pippa A Thomson 64          |
| Esther Molina 67, 153            | James B Potash 86                    | Lise Wegner Thørner 88      |
| Francis M Mondimore 86           | Martin Preisig 66                    | Apostolia Topaloudi 194     |
| Preben Bo Mortensen 12, 29, 30   | Jorge A Quiroz 172                   | Ioanna Tzoulaki 84, 85, 195 |
| Benoit H Mulsant 101, 131        | Charles F Reynolds III 173           | Monica Uddin 196            |
| Joonas Naamanka 121              | John P Rice 142                      | André G Uitterlinden 197    |
| Jake M Najman 154                | Giovanni A Salum 174                 | Henrik Ullum 88, 198, 199   |
| Matthias Nauck 155, 156          | Robert A Schoevers 175, 176          | Daniel Umbricht 200         |
| Igor Nenadi? 157                 | Andrew Schork 30, 177, 178           | Robert J Ursano 201         |
| Kasper R Nielsen 158             | Thomas G Schulze 2, 21, 86, 179, 180 | Sandra Van der Auwera 202   |
| Ilja M Nolte 159                 | Tabea S Send 87                      | David A van Heel 122        |
| Merete Nordentoft 60, 103, 104   | Jianxin Shi 181                      | Albert M van Hemert 203     |
| Markus M Nöthen 76               | Engilbert Sigurdsson 114             | Abirami Veluchamy 186       |
| Mette Nyegaard 30, 160, 161, 162 | Kritika Singh 27                     | Alexander Viktorin 25       |
| Michael C O'Donovan 80           | Grant C B Sinnamon 182               | Henry Völzke 192            |
| Asmundur Oddsson 50              | Lea Sirignano 2                      | Agaz Wani 196               |
| Catherine M Olsen 163, 164       | Olav B Smeland 183, 184              | G Bragi Walters 50          |
| Hogni Oskarsson 165              |                                      | Robin G Walters 71, 72      |

|                                                   |                               |                                       |
|---------------------------------------------------|-------------------------------|---------------------------------------|
| Sylvia Wassertheil-Smoller<br>204                 | Hilary Coon 94                | Lili Milani 136                       |
| Myrna M Weissman 205,<br>206                      | William E Copeland 218        | Ole Mors 30, 233                      |
| Jürgen Wellmann 191                               | Byron Creese 43               | Daniel J Müller 101, 131, 132,<br>234 |
| David C Whiteman 163                              | Lea K Davis 27                | Bertram Müller-Myhsok 38,<br>235, 236 |
| Derek Wildman 196                                 | Eske M Derks 24               | Albertine J Oldehinkel 115            |
| Gonneke Willemsen 82                              | Enrico Domenici 219           | Sara A Paciga 237                     |
| Alexander T Williams 167                          | Paul Elliott 84, 85, 195, 220 | Colin NA Palmer 186                   |
| Bendik S Winsvold 51, 52,<br>207                  | Andreas J Forstner 73, 76     | Peristera Paschou 194                 |
| Stephanie H Witt 2                                | Micha Gawlik 221              | Brenda WJH Penninx 45                 |
| Ying Xiong 25                                     | Joel Gelernter 19, 143, 222   | Roy H Perlis 5, 6, 238                |
| Lea Zillich 2                                     | Hans J Grabe 202              | Giorgio Pistis 66                     |
| John-Anker Zwart 51, 52,<br>53                    | Steven P Hamilton 223         | Renato Polimanti 18, 19               |
| 23andMe Research Team<br>125                      | Kristian Hveem 224, 225, 226  | David J Porteous 64                   |
| Estonian Biobank Research<br>Team 136             | Catherine John 167, 227       | Danielle Posthuma 239, 240            |
| HUNT All-In Psychiatry 208                        | Jaakko Kaprio 141             | Ted Reichborn-Kjennerud 40            |
| China Kadoorie Biobank<br>Collaborative Group 209 | Tilo Kircher 157              | Andreas Reif 31                       |
| Genes & Health Research<br>Team 210               | Marie-Odile Krebs 228         | Frances Rice 80, 241                  |
| Ole A Andreassen 183, 184,<br>211                 | Karoline Kuchenbaecker 9, 71  | Roland Ricken 3                       |
| Bernhard T Baune 212, 213,<br>214                 | Mikael Landén 25, 127         | Marcella Rietschel 2                  |
| Klaus Berger 191                                  | Kelli Lehto 136               | Margarita Rivera 67, 242              |
| Dorret I Boomsma 82                               | Douglas F Levinson 229        | Christian Rück 243                    |
| Anders D Børglum 30, 34,<br>35                    | Qingqin S Li 230              | Catherine Schaefer 244                |
| Gerome Breen 4, 8                                 | Klaus Lieb 102                | Srijan Sen 106, 245                   |
| Na Cai 215, 216, 217                              | Yi Lu 25                      | Alessandro Serretti 105               |
|                                                   | Susanne Lucae 123             | Alkistis Skalkidou 137                |
|                                                   | Jurjen J Luykx 15, 231        | Jordan W Smoller 5, 246, 247          |
|                                                   | Patrik K Magnusson 25         | Frederike Stein 189                   |
|                                                   | Nicholas G Martin 24          | Murray B Stein 248, 249, 250          |
|                                                   | Hilary C Martin 7             | Patrick F Sullivan 25, 251            |
|                                                   | Andrew McQuillin 9            | Martin Tesli 40                       |
|                                                   | Christel M Middeldorp 62, 232 |                                       |

Thorgeir E Thorgeirsson 50

Henning Tiemeier 252, 253

Nicholas J Timpson 14

Rudolf Uher 254

Jens R Wendland 42

Thomas Werge 60, 177, 199,  
255, 256

Naomi R Wray 16, 257

Stephan Ripke 3, 246

Cathryn M Lewis 4, 258

Andrew M McIntosh 1, 25

- 1, Division of Psychiatry, University of Edinburgh, Edinburgh, UK
- 2, Department of Genetic Epidemiology in Psychiatry, Central Institute of Mental Health, Medical Faculty Mannheim, Heidelberg University, Mannheim, BW, DE
- 3, Department of Psychiatry and Psychotherapy, Charité – Universitätsmedizin Berlin, Berlin, BE, DE
- 4, Social, Genetic and Developmental Psychiatry Centre, King's College London, London, UK
- 5, Department of Psychiatry, Massachusetts General Hospital, Boston, MA, US
- 6, Department of Psychiatry, Harvard Medical School, Boston, MA, US
- 7, Human Genetics, Wellcome Sanger Institute, Hinxton, UK
- 8, NIHR Maudsley Biomedical Research Centre, King's College London, London, UK
- 9, Division of Psychiatry, University College London, London, UK
- 10, Department of Clinical Medicine, Aarhus University, Aarhus, DK
- 11, Department of Medical Biochemistry and Biophysics, Karolinska Institutet, Stockholm, SE
- 12, National Centre for Register-based Research, Aarhus University, Aarhus, DK
- 13, Department of Pediatric Neurology, Charité – Universitätsmedizin Berlin, Berlin, BE, DE
- 14, MRC Integrative Epidemiology Unit, University of Bristol, Bristol, UK
- 15, Department of Psychiatry and Neuropsychology, School for Mental Health and Neuroscience, Maastricht University Medical Centre, Maastricht, NL
- 16, Institute for Molecular Bioscience, University of Queensland, Brisbane, QLD, AU
- 17, Maurice Wohl Clinical Neuroscience Institute, Department of Basic and Clinical Neuroscience, King's College London, London, UK
- 18, Veterans Affairs Connecticut Healthcare System, West Haven, CT, US
- 19, Department of Psychiatry, Yale University School of Medicine, New Haven, CT, US
- 20, Department of Psychiatry, University of Munich, Munich, BY, DE
- 21, Institute of Psychiatric Phenomics and Genomics, University of Munich, Munich, BY, DE
- 22, Department of Psychiatry and Psychotherapy, University Hospital Bonn, Medical Faculty, University of Bonn, Bonn, DE
- 23, Institute of Human Genetics, University Hospital Bonn, Medical Faculty, University of Bonn, Bonn, DE
- 24, Mental Health and Neuroscience, QIMR Berghofer Medical Research Institute, Brisbane, QLD, AU
- 25, Department of Medical Epidemiology and Biostatistics, Karolinska Institutet, Stockholm, SE
- 26, Old Age Psychiatry, King's College London, London, UK
- 27, Department of Medicine, Division of Genetic Medicine, Vanderbilt University Medical Center, Nashville, TN, US



- 28, Department of Psychiatry and Psychotherapy, Fliedner Klinik Berlin, Berlin, BE, DE
- 29, Centre for Integrated Register-based Research, Aarhus University, Aarhus, DK
- 30, iPSYCH, The Lundbeck Foundation Initiative for Integrative Psychiatric Research, Aarhus, DK
- 31, Department of Psychiatry, Psychosomatic Medicine and Psychotherapy, Goethe University Frankfurt - University Hospital, Frankfurt am Main, DE
- 32, Discipline of Psychiatry, University of Adelaide, Adelaide, SA, AU
- 33, Department of Epidemiology, Columbia University Mailman School of Public Health, New York, NY, US
- 34, Department of Biomedicine and Centre for Integrative Sequencing, iSEQ, Aarhus University, Aarhus, DK
- 35, Center for Genomics and Personalized Medicine, Aarhus University, Aarhus, DK
- 36, Department of Clinical Neuroscience, Karolinska Institutet,, SE
- 37, Department of Neurology, Klinikum rechts der Isar, Technical University of Munich, Munich, BY, DE
- 38, Department of Translational Research in Psychiatry, Max Planck Institute of Psychiatry, Munich, BY, DE
- 39, Institute for Translational Psychiatry, University of Münster, Münster, NRW, DE
- 40, Department of Mental Disorders, Norwegian Institute of Public Health, Oslo, NO
- 41, PROMENTA Research Center, Department of Psychology, University of Oslo, Oslo, NO
- 42, Research and Development, Takeda Pharmaceutical Company Limited, Cambridge, MA, US
- 43, Faculty of Health and Life Sciences, University of Exeter, Exeter, UK
- 44, Novo Nordisk Center for Protein Research, Department of Health Sciences, University of Copenhagen, Copenhagen, DK
- 45, Department of Psychiatry, Amsterdam Public Health and Amsterdam Neuroscience, Amsterdam UMC, Vrije Universiteit Amsterdam, Amsterdam, NL
- 46, Morphology and Genetics, Universidade Federal de Sao Paulo, Sao Paulo, SP, BR
- 47, Department of Psychiatry and Behavioral Sciences, Emory University School of Medicine, Atlanta, GA, US
- 48, Faculty of Nursing and Health Sciences, NORD University, Levanger, NO
- 49, Department of Mental Health, Faculty of Medicine and Health Sciences, Norwegian University of Science and Technology (NTNU), Trondheim, TRD, NO
- 50, deCODE Genetics / Amgen, Reykjavik, IS
- 51, K. G. Jebsen Center for Genetic Epidemiology, Department of Public Health and Nursing, Faculty of Medicine and Health Sciences, Norwegian University of Science and Technology (NTNU), Trondheim, TRD, NO

- 52, Department of Research and Innovation, Division of Clinical Neuroscience, Oslo University Hospital, Oslo, NO
- 53, Institute of Clinical Medicine, Faculty of Medicine, University of Oslo, Oslo, NO
- 54, Institute of Environmental Medicine, Unit of Integrative Epidemiology, Karolinska Institutet, Stockholm, SE
- 55, Department of Psychiatry and Psychotherapy, Charité – Universitätsmedizin Berlin, Berlin, DE
- 56, Department of Clinical Immunology, Roskilde University/Næstved Hospital, Roskilde, DK
- 57, Department of Clinical Immunology, Odense University Hospital, Odense, DK
- 58, Department of Psychiatry, Psychotherapy and Psychosomatics, Brandenburg Medical School Theodor Fontane, Neuruppin, BB, DE
- 59, Department of Psychiatry and Psychotherapy, Gender Research in Medicine, Institute of Sexology and Sexual Medicine, Charité – Universitätsmedizin Berlin, Berlin, BE, DE
- 60, iPSYCH, The Lundbeck Foundation Initiative for Integrative Psychiatric Research, Copenhagen, DK
- 61, Center for Neonatal Screening, Department for Congenital Disorders, Statens Serum Institut, Copenhagen, DK
- 62, Child Health Research Centre, University of Queensland, Brisbane, QLD, AU
- 63, Centre for Medical Informatics, Usher Institute, University of Edinburgh, Edinburgh, UK
- 64, Centre for Genomic & Experimental Medicine, Institute for Genetics and Cancer, University of Edinburgh, Edinburgh, UK
- 65, Department of Psychiatry and Mental Health, University of Cape Town, Cape Town, SA
- 66, Department of Psychiatry, Lausanne University Hospital and University of Lausanne, Prilly, VD, CH
- 67, Instituto de Investigación Biosanitaria ibs.GRANADA, Granada, ES
- 68, Department of Psychiatry, Faculty of Medicine and Institute of Neurosciences, Biomedical Research Centre (CIBM), University of Granada, Granada, ES
- 69, Université de Paris Cité, INSERM U1266, Institute of Psychiatry and Neuroscience of Paris, GHU Paris Psychiatry and Neuroscience, Paris, FR
- 70, Translational Biology, Biogen, Cambridge, MA, US
- 71, Nuffield Department of Population Health, University of Oxford, Oxford, UK
- 72, MRC Population Health Research Unit, University of Oxford, Oxford, UK
- 73, Institute of Neuroscience and Medicine (INM-1), Research Center Juelich, Juelich, DE
- 74, Human Genomics Research Group, Department of Biomedicine, University of Basel, Basel, CH
- 75, Institute of Medical Genetics and Pathology, University Hospital Basel, University of Basel, Basel, CH

- 76, Institute of Human Genetics, University of Bonn, School of Medicine & University Hospital Bonn, Bonn, DE
- 77, Nic Waals Institute, Lovisenberg Diakonale Hospital, Oslo, NO
- 78, Centre for Advanced Imaging, University of Queensland, Saint Lucia, QLD, AU
- 79, Psychological Medicine, Cardiff University, Cardiff, WLS, UK
- 80, Centre for Neuropsychiatric Genetics and Genomics, Cardiff University, Cardiff, WLS, UK
- 81, The Lothian Birth Cohorts, University of Edinburgh, Edinburgh, UK
- 82, Department of Biological Psychology & Amsterdam Public Health Research Institute, Vrije Universiteit Amsterdam, Amsterdam, NL
- 83, Department of Child and Adolescent Psychiatry, Psychosomatics and Psychotherapy, University Hospital Essen, University of Duisburg-Essen, Duisburg, DE
- 84, MRC Centre for Environment and Health, School of Public Health, Imperial College London, London, UK
- 85, Imperial College Dementia Research Institute, Imperial College London, London, UK
- 86, Department of Psychiatry and Behavioral Sciences, Johns Hopkins University School of Medicine, Baltimore, MD, US
- 87, Department of Psychiatry and Psychotherapy, Research Group Stress Related Disorders, Central Institute of Mental Health, Medical Faculty Mannheim, Heidelberg University, Mannheim, BW, DE
- 88, Department of Clinical Immunology, Copenhagen University Hospital, Rigshospitalet, Copenhagen, CPH, DK
- 89, Department of Clinical Immunology, Aarhus University Hospital, Aarhus, DK
- 90, Department of Psychiatry, Istanbul University, Istanbul, TR
- 91, Department of Medical Genetics, Oslo University Hospital, Oslo, OSL, NO
- 92, NORMENT, Department of Clinical Science, University of Bergen, Bergen, NO
- 93, Virginia Institute for Psychiatric & Behavioral Genetics, Virginia Commonwealth University, Richmond, VA, US
- 94, Psychiatry Department / Huntsman Mental Health Institute, University of Utah School of Medicine, Salt Lake City, UT, US
- 95, Center for Genomic Research, University of Utah School of Medicine, Salt Lake City, UT, US
- 96, Department of Psychiatry and Psychotherapy, Medical Center, University of Freiburg, Faculty of Medicine, University of Freiburg, Freiburg, DE
- 97, Division of Mental Health Care, St. Olavs Hospital, Trondheim University Hospital, Trondheim, TRD, NO
- 98, Department of Psychiatry, Sørlandet Hospital, Kristiansand, AG, NO
- 99, University of Oslo, NORMENT Centre, Institute of Clinical Medicine, Oslo, OSL, NO

- 100, Center for Genomic Medicine, Massachusetts General Hospital, Boston, MA, US
- 101, Centre for Addiction and Mental Health, Toronto, ON, CA
- 102, Department of Psychiatry and Psychotherapy, University Medical Center of the Johannes Gutenberg University Mainz, Mainz, DE
- 103, Mental Health Center Copenhagen, Mental Health Services Capital Region of Denmark, Copenhagen, DK
- 104, Faculty of Health Science, Department of Clinical Medicine, University of Copenhagen, Copenhagen, DK
- 105, Department of Biomedical and Neuromotor Sciences, University of Bologna, Bologna, IT
- 106, Michigan Neuroscience Institute, University of Michigan, Ann Arbor, MI, US
- 107, Wolfson Institute of Population Health, Queen Mary University of London, London, UK
- 108, School of Computing and Mathematical Sciences, University of Leicester, Leicester, UK
- 109, Department of Epidemiology and Biostatistics, Imperial College London, London, UK
- 110, Discipline of Psychiatry, School of Medicine, Trinity College Dublin, Dublin, IE
- 111, Bioinformatics Research Centre, Aarhus University, Aarhus, DK
- 112, School of Engineering, University of Iceland, Reykjavik, IS
- 113, Danish Headache Centre, Department of Neurology, Rigshospitalet, Glostrup, DK
- 114, Faculty of Medicine, Department of Psychiatry, University of Iceland, Reykjavik, IS
- 115, Department of Psychiatry, University of Groningen, University Medical Center Groningen, Groningen, NL
- 116, MRC Human Genetics Unit, Institute for Genetics and Cancer, University of Edinburgh, Edinburgh, UK
- 117, Brain and Mind Centre, University of Sydney, Sydney, NSW, AU
- 118, Department of Epidemiology Research, Statens Serum Institut, Copenhagen, DK
- 119, Interfaculty Institute for Genetics and Functional Genomics, Department of Functional Genomics, University Medicine Greifswald, Greifswald, MV, DE
- 120, Roche Pharmaceutical Research and Early Development, Pharmaceutical Sciences, Roche Innovation Center Basel, F. Hoffmann-La Roche Ltd, Basel, CH
- 121, SleepWell Research Program and Department of Psychology and Logopedics, University of Helsinki, Helsinki, FI
- 122, Blizard Institute, Barts and the London School of Medicine and Dentistry, Queen Mary University of London, London, UK
- 123, Max Planck Institute of Psychiatry, Munich, BY, DE
- 124, Department of Psychiatry, University of Helsinki, Helsinki, FI

- 125, 23andMe Research Team, 23andMe, Inc., Sunnyvale, CA, US
- 126, Department of Psychological Medicine, University of Worcester, Worcester, UK
- 127, Institution of Neuroscience and Physiology, University of Gothenburg, Gothenburg, SE
- 128, Department of Psychiatry and Psychotherapy, Medical University of Vienna, Vienna, AT
- 129, Department of Psychiatry, Virginia Commonwealth University, Richmond, VA, US
- 130, Health Care Policy, Harvard Medical School, Boston, MA, US
- 131, Department of Psychiatry, University of Toronto, Toronto, ON, CA
- 132, Department of Pharmacology & Toxicology, University of Toronto, Toronto, ON, CA
- 133, Department of Genetics, Rutgers University, Piscataway, NJ, US
- 134, Department of Psychiatry, Perelman School of Medicine, University of Pennsylvania, Philadelphia, PA, US
- 135, Mental Illness Research, Education and Clinical Center, Crescenz VA Medical Center, Philadelphia, PA, US
- 136, Estonian Genome Centre, Institute of Genomics, University of Tartu, Tartu, EE
- 137, Department of Women's and Children's Health, Uppsala University, Uppsala, SE
- 138, Department of Epidemiology and Health Systems, Center for Primary Care and Public Health, Lausanne, VD, CH
- 139, Swiss Institute of Bioinformatics, Lausanne, VD, CH
- 140, Department of Computational Biology, University of Lausanne, Lausanne, VD, CH
- 141, Institute for Molecular Medicine Finland - FIMM, University of Helsinki, Helsinki, FI
- 142, Department of Psychiatry, Washington University School of Medicine in St. Louis, St. Louis, MO, US
- 143, Psychiatry, Veterans Affairs Connecticut Healthcare System, West Haven, CT, US
- 144, Department of Psychiatry, Yale University, New Haven, CT, US
- 145, Department of Epidemiology and Biostatistics, School of Public Health, Peking University, Beijing, CN
- 146, Peking University Center for Public Health and Epidemic Preparedness & Response, Peking University, Beijing, CN
- 147, Mental Health, NHS 24, Glasgow, UK
- 148, Royal Edinburgh Hospital, NHS Lothian, Edinburgh, UK
- 149, Department of Psychiatry and Psychotherapy, University of Bonn, Bonn, DE
- 150, Center for Translational and Computational Neuroimmunology, Columbia University Medical Center, New York, NY, US

- 151, Institute for Translational Neuroscience, University of Münster, Münster, NRW, DE
- 152, Novo Nordisk Foundation Center for Basic Metabolic Research, Faculty of Health Science, Copenhagen University, Copenhagen, DK
- 153, Department of Nursing, Faculty of Health Sciences and Institute of Neurosciences, Biomedical Research Centre (CIBM), University of Granada, Granada, ES
- 154, School of Public Health, University of Queensland, Brisbane, QLD, AU
- 155, DZHK (German Centre for Cardiovascular Research), Partner Site Greifswald, Greifswald, MV, DE
- 156, Institute of Clinical Chemistry and Laboratory Medicine, University Medicine Greifswald, Greifswald, MV, DE
- 157, Department of Psychiatry, University of Marburg, Marburg, DE
- 158, Department of Clinical Immunology, Aalborg University Hospital, Aalborg, DK
- 159, Department of Epidemiology, University of Groningen, University Medical Center Groningen, Groningen, NL
- 160, Department of Health, Science and Technology, Aalborg University, Aalborg, DK
- 161, Centre for Integrative Sequencing, iSEQ, Aarhus University, Aarhus, DK
- 162, Department of Biomedicine-Human Genetics, Aarhus University, Aarhus, DK
- 163, Population Health, QIMR Berghofer Medical Research Institute, Brisbane, QLD, AU
- 164, The Fraser Institute, Faculty of Medicine, University of Queensland, Brisbane, QLD, AU
- 165, Humus, Reykjavik, IS
- 166, Department of Clinical Medicine, University of Copenhagen, Copenhagen, CPH, DK
- 167, Department of Population Health Sciences, University of Leicester, Leicester, UK
- 168, Department of Psychiatry, Universidade Federal de Sao Paulo, Sao Paulo, SP, BR
- 169, Department of Psychiatry, Rutgers University, Piscataway, NJ, US
- 170, Department of Clinical Immunology, Zealand University Hospital, Køge, DK
- 171, Department of Psychiatry and Behavioral Sciences, SUNY Downstate Health Sciences University, Brooklyn, NY, US
- 172, NMD Pharma, Lexington, MA, US
- 173, Psychiatry, University of Pittsburgh Medical Centre, Pittsburgh, PA, US
- 174, Psychiatry, Universidade Federal do Rio Grande do Sul, Porto Alegre, BR
- 175, Department of Psychiatry, University Medical Center Groningen, Groningen, NL
- 176, Research School of Behavioural and Cognitive Neurosciences (BCN), University of Groningen, Groningen, NL



- 177, Institute of Biological Psychiatry, Mental Health Center Sct. Hans, Mental Health Services Capital Region of Denmark, Copenhagen, DK
- 178, Neurogenomics Division, The Translational Genomics Research Institute (TGEN), Phoenix, AZ, US
- 179, Human Genetics Branch, NIMH Division of Intramural Research Programs, Bethesda, MD, US
- 180, Department of Psychiatry and Psychotherapy, University Medical Center Göttingen, Goettingen, NI, DE
- 181, Division of Cancer Epidemiology and Genetics, National Cancer Institute, Bethesda, MD, US
- 182, School of Medicine and Dentistry, James Cook University, Townsville, QLD, AU
- 183, Division of Mental Health and Addiction, Oslo University Hospital, Oslo, OSL, NO
- 184, NORMENT, Institute of Clinical Medicine, University of Oslo, Oslo, OSL, NO
- 185, Institute of Health and Wellbeing, University of Glasgow, Glasgow, UK
- 186, Division of Population Health and Genomics, Ninewells Hospital and School of Medicine, University of Dundee, Dundee, UK
- 187, Faculty of Medicine, University of Iceland, Reykjavik, IS
- 188, SAMRC Unit on Risk & Resilience in Mental Disorders, Department of Psychiatry and Mental Health, University of Cape Town, Cape Town, SA
- 189, Department of Psychiatry and Psychotherapy, University of Marburg, Marburg, HE, DE
- 190, Department of Psychiatry, Psychotherapy and Psychosomatics, Dr. Fontheim Mentale Gesundheit, Liebenburg, DE
- 191, Institute of Epidemiology and Social Medicine, University of Münster, Münster, NRW, DE
- 192, Institute for Community Medicine, University Medicine Greifswald, Greifswald, MV, DE
- 193, Wolfson Centre for Young People's Mental Health, Division of Psychological Medicine and Clinical Neurosciences, Cardiff University, Cardiff, WLS, UK
- 194, Department of Biological Sciences, Purdue University, West Lafayette, IN, US
- 195, Imperial College BHF Centre for Research Excellence, Imperial College London, London, UK
- 196, Genomics Program, University of South Florida College of Public Health, Tampa, FL, US
- 197, Department of Internal Medicine, Erasmus University Medical Center Rotterdam, Rotterdam, NL
- 198, Management Section, Statens Serum Institut, Copenhagen, DK
- 199, Department of Clinical Medicine, University of Copenhagen, Copenhagen, DK
- 200, Xperimed LLC, Basel, CH
- 201, Psychiatry, USUHS, Bethesda, US

- 202, Department of Psychiatry and Psychotherapy, University Medicine Greifswald, Greifswald, MV, DE
- 203, Department of Psychiatry, Leiden University Medical Center, Leiden, NL
- 204, Department of Epidemiology and Population Health, Albert Einstein College of Medicine, Bronx, NY, US
- 205, Department of Psychiatry, Columbia University College of Physicians and Surgeons, New York, NY, US
- 206, Division of Epidemiology, New York State Psychiatric Institute, New York, NY, US
- 207, Department of Neurology, Oslo University Hospital, Oslo, NO
- 208, HUNT All-In Psychiatry
- 209, China Kadoorie Biobank Collaborative Group
- 210, Genes & Health Research Team
- 211, KG Jebsen Centre for Neurodevelopmental Research, University of Oslo, Oslo, OS, NO
- 212, Department of Psychiatry, University of Melbourne, Melbourne, VIC, AU
- 213, Florey Institute of Neuroscience and Mental Health, University of Melbourne, Melbourne, VIC, AU
- 214, Department of Psychiatry, University of Münster, Münster, NRW, DE
- 215, Computational Health Centre, Helmholtz Zentrum München, Neuherberg, DE
- 216, School of Medicine, Technical University of Munich, Munich, BY, DE
- 217, Helmholtz Pioneer Campus, Helmholtz Zentrum München, Neuherberg, DE
- 218, Department of Psychiatry, University of Vermont, Burlington, VT, US
- 219, Department of Cellular, Computational and Integrative Biology, Università degli Studi di Trento, Trento, IT
- 220, Imperial College Biomedical Research Centre, Imperial College London, London, UK
- 221, Department of Psychiatry, Psychosomatics and Psychotherapy, Julius-Maximilians-Universität Würzburg, Würzburg, DE
- 222, Department of Genetics, Department of Neuroscience, Yale University School of Medicine, New Haven, CT, US
- 223, Psychiatry, Kaiser Permanente Northern California, San Francisco, CA, US
- 224, K. G. Jebsen Center for Genetic Epidemiology, Department of Public Health and Nursing, Faculty of Medicine and Health Sciences, Norwegian University of Science and Technology (NTNU), Trondheim, NO
- 225, HUNT Research Center, Department of Public Health and Nursing, Faculty of Medicine and Health Sciences, Norwegian University of Science and Technology (NTNU), Trondheim, NO

- 226, Department of Research, Innovation and Education, St. Olavs Hospital, Trondheim University Hospital, Trondheim, NO
- 227, NIHR Leicester Biomedical Research Centre, Glenfield Hospital, Leicester, UK
- 228, Pathophysiology of Psychiatric Diseases, INSERM, Univ Paris Cité, GHU Paris, Paris, FR
- 229, Department of Psychiatry & Behavioral Sciences, Stanford University, Stanford, CA, US
- 230, Neuroscience Therapeutic Area, Janssen Research and Development, LLC, Titusville, NJ, US
- 231, Second Opinion Outpatient Clinic, GGNet Mental Health, Warnsveld, NL
- 232, Child and Youth Mental Health Service, Children's Health Queensland Hospital and Health Service, Brisbane, QLD, AU
- 233, Psychosis Research Unit, Aarhus University Hospital-Psychiatry, Aarhus, DK
- 234, Department of Psychiatry, Psychosomatics and Psychotherapy, University Hospital of Würzburg, Würzburg, DE
- 235, Munich Cluster for Systems Neurology (SyNergy), Munich, BY, DE
- 236, University of Liverpool, Liverpool, UK
- 237, Human Genetics and Computational Biomedicine, Pfizer Global Research and Development, Groton, CT, US
- 238, Centre for Quantitative Health, Massachusetts General Hospital, Boston, MA, US
- 239, Child and Adolescent Psychiatry, Amsterdam UMC, Vrije Universiteit Amsterdam, Amsterdam, NL
- 240, Complex Trait Genetics, Vrije Universiteit Amsterdam, Amsterdam, NL
- 241, Wolfson Centre for Young People's Mental Health, Division of Psychological Medicine and Clinical Neurosciences, Cardiff University, Cardiff, UK
- 242, Department of Biochemistry and Molecular Biology II, Faculty of Pharmacy and Institute of Neurosciences, Biomedical Research Centre (CIBM), University of Granada, Granada, ES
- 243, Department of Clinical Neuroscience, Karolinska Institutet, Stockholm, SE
- 244, Division of Research, Kaiser Permanente Northern California, Oakland, CA, US
- 245, Department of Psychiatry, University of Michigan, Ann Arbor, MI, US
- 246, Stanley Center for Psychiatric Research, Broad Institute of MIT and Harvard, Cambridge, MA, US
- 247, Psychiatric and Neurodevelopmental Genetics Unit, Massachusetts General Hospital, Boston, MA, US
- 248, Psychiatry, UCSD School of Medicine, La Jolla, CA, US
- 249, Public Health, UCSD School of Public Health, La Jolla, CA, US
- 250, Psychiatry, Veterans Affairs San Diego Healthcare System, San Diego, CA, US

251, Departments of Genetics and Psychiatry, University of North Carolina at Chapel Hill, Chapel Hill, NC, US

252, Child and Adolescent Psychiatry, Erasmus University Medical Center Rotterdam, Rotterdam, NL

253, Social and Behavioral Science, Harvard T.H. Chan School of Public Health, Boston, MA, US

254, Psychiatry, Dalhousie University, Halifax, NS, CA

255, Institute of Biological Psychiatry, Mental Health Center Sct. Hans, Copenhagen University Hospital, Mental Health Services, Copenhagen, DK

256, GLOBE Institute, Lundbeck Foundation Centre for Geogenetics, University of Copenhagen, Copenhagen, DK

257, Queensland Brain Institute, University of Queensland, Brisbane, QLD, AU

258, Department of Medical & Molecular Genetics, King's College London, London, UK

259, Institute for Genomics and Cancer, University of Edinburgh, Edinburgh, UK

## References

- Als, T. D., Kurki, M., Grove, J., Voloudakis, G., Therrien, K., Tasanko, E., Nielsen, T. T., Naamanka, J., Veerapen, K., Levey, D., Bendl, J., Bybjerg-Grauholm, J., Zheng, B., Demontis, D., Rosengren, A., Athanasiadis, G., Bækved-Hansen, M., Qvist, P., Walters, B., ... Børghlum, A. D. (2022). *Identification of 64 new risk loci for major depression, refinement of the genetic architecture and risk prediction of recurrence and comorbidities* [Preprint]. *Genetic and Genomic Medicine*. <https://doi.org/10.1101/2022.08.24.22279149>
- Bycroft, C., Freeman, C., Petkova, D., Band, G., Elliott, L. T., Sharp, K., Motyer, A., Vukcevic, D., Delaneau, O., O'Connell, J., Cortes, A., Welsh, S., Young, A., Effingham, M., McVean, G., Leslie, S., Allen, N., Donnelly, P., & Marchini, J. (2018). The UK Biobank resource with deep phenotyping and genomic data. *Nature*, *562*(7726), 203–209. <https://doi.org/10.1038/s41586-018-0579-z>
- Chang, C. C., Chow, C. C., Tellier, L. C. A. M., Vattikuti, S., Purcell, S. M., & Lee, J. J. (2015). Second-generation PLINK: rising to the challenge of larger and richer datasets. *GigaScience*, *4*(1), 7. <https://doi.org/10.1186/s13742-015-0047-8>
- Dashti, H. S., Redline, S., & Saxena, R. (2018). Polygenic risk score identifies associations between sleep duration and diseases determined from an electronic medical record biobank. *Sleep*, *42*, 1–10. <https://doi.org/10.1093/sleep/zsy247>
- Grotzinger, A. D., Mallard, T. T., Akingbuwa, W. A., Ip, H. F., Adams, M. J., Lewis, C. M., McIntosh, A. M., Grove, J., Dalsgaard, S., Lesch, K.-P., Strom, N., Meier, S. M., Mattheisen, M., Børghlum, A. D., Mors, O., Breen, G., iPSYCH, Mattheisen, M., Mors, O., ... Nivard, M. G. (2022). Genetic architecture of 11 major psychiatric disorders at biobehavioral, functional genomic and molecular genetic levels of analysis. *Nature Genetics*, *54*(5), 548–559. <https://doi.org/10.1038/s41588-022-01057-4>
- Johnston, K. J. A., Adams, M. J., Nicholl, B. I., Ward, J., Strawbridge, R. J., Ferguson, A., McIntosh, A. M., Bailey, M. E. S., & Smith, D. J. (2019). Genome-wide association study of multisite

chronic pain in UK Biobank. *PLOS Genetics*, 15(6), e1008164.

<https://doi.org/10.1371/journal.pgen.1008164>

Lam, M., Awasthi, S., Watson, H. J., Goldstein, J., Panagiotaropoulou, G., Trubetskoy, V., Karlsson, R., Frei, O., Fan, C.-C., De Witte, W., Mota, N. R., Mullins, N., Brügger, K., Lee, S. H., Wray, N. R., Skarabis, N., Huang, H., Neale, B., Daly, M. J., ... Ripke, S. (2020). RICOPIII: Rapid Imputation for COnsortias PIpeLine. *Bioinformatics (Oxford, England)*, 36(3), 930–933.

<https://doi.org/10.1093/bioinformatics/btz633>

Liu, M., Jiang, Y., Wedow, R., Li, Y., Brazel, D. M., Chen, F., Datta, G., Davila-Velderrain, J., McGuire, D., Tian, C., Zhan, X., Agee, M., Alipanahi, B., Auton, A., Bell, R. K., Bryc, K., Elson, S. L., Fontanillas, P., Furlotte, N. A., ... HUNT All-In Psychiatry. (2019). Association studies of up to 1.2 million individuals yield new insights into the genetic etiology of tobacco and alcohol use. *Nature Genetics*, 51(2), 237–244. <https://doi.org/10.1038/s41588-018-0307-5>

Mullins, N., Forstner, A. J., O’Connell, K. S., Coombes, B., Coleman, J. R. I., Qiao, Z., Als, T. D., Bigdeli, T. B., Børte, S., Bryois, J., Charney, A. W., Drange, O. K., Gandal, M. J., Hagenaars, S. P., Ikeda, M., Kamitaki, N., Kim, M., Krebs, K., Panagiotaropoulou, G., ... HUNT All-In Psychiatry. (2021). Genome-wide association study of more than 40,000 bipolar disorder cases provides new insights into the underlying biology. *Nature Genetics*, 53(6), 817–829.

<https://doi.org/10.1038/s41588-021-00857-4>

Nagel, M., Jansen, P. R., Stringer, S., Watanabe, K., de Leeuw, C. A., Bryois, J., Savage, J. E., Hammerschlag, A. R., Skene, N. G., Muñoz-Manchado, A. B., Agee, M., Alipanahi, B., Auton, A., Bell, R. K., Bryc, K., Elson, S. L., Fontanillas, P., Furlotte, N. A., Hinds, D. A., ... andMe Research, T. (2018). Meta-analysis of genome-wide association studies for neuroticism in 449,484 individuals identifies novel genetic loci and pathways. *Nature Genetics*, 50(7), 920–927. <https://doi.org/10.1038/s41588-018-0151-7>

Nievergelt, C. M., Maihofer, A. X., Klengel, T., Atkinson, E. G., Chen, C.-Y., Choi, K. W., Coleman, J. R. I., Dalvie, S., Duncan, L. E., Gelernter, J., Levey, D. F., Logue, M. W., Polimanti, R., Provost, A.



C., Ratanatharathorn, A., Stein, M. B., Torres, K., Aiello, A. E., Almlí, L. M., ... Koenen, K. C. (2019). International meta-analysis of PTSD genome-wide association studies identifies sex- and ancestry-specific genetic risk loci. *Nature Communications*, *10*(1), 4558.

<https://doi.org/10.1038/s41467-019-12576-w>

Okbay, A., Wu, Y., Wang, N., Jayashankar, H., Bennett, M., Nehzati, S. M., Sidorenko, J., Kweon, H., Goldman, G., Gjorgjieva, T., Jiang, Y., Hicks, B., Tian, C., Hinds, D. A., Ahlsgog, R., Magnusson, P. K. E., Oskarsson, S., Hayward, C., Campbell, A., ... Young, A. I. (2022). Polygenic prediction of educational attainment within and between families from genome-wide association analyses in 3 million individuals. *Nature Genetics*, *54*(4), 437–449.

<https://doi.org/10.1038/s41588-022-01016-z>

Pulit, S. L., Stoneman, C., Morris, A. P., Wood, A. R., Glastonbury, C. A., Tyrrell, J., Yengo, L., Ferreira, T., Marouli, E., Ji, Y., Yang, J., Jones, S., Beaumont, R., Croteau-Chonka, D. C., Winkler, T. W., GIANT Consortium, Hattersley, A. T., Loos, R. J. F., Hirschhorn, J. N., ... Lindgren, C. M. (2019). Meta-analysis of genome-wide association studies for body fat distribution in 694 649 individuals of European ancestry. *Human Molecular Genetics*, *28*(1), 166–174.

<https://doi.org/10.1093/hmg/ddy327>

The 1000 Genomes Project Consortium. (2015). A global reference for human genetic variation. *Nature*, *526*, 68–74. <https://doi.org/10.1038/nature15393>

Walters, R. K., Adams, M. J., Adkins, A. E., Aliev, F., Bacanu, S.-A., Batzler, A., Bertelsen, S., Biernacka, J., Bigdeli, T. B., Chen, L.-S., Clarke, T.-K., Chou, Y.-L., Degenhardt, F., Docherty, A. R., Fontanillas, P., Foo, J., Fox, L., Frank, J., Giegling, I., ... Agrawal, A. (2018). Trans-ancestral GWAS of alcohol dependence reveals common genetic underpinnings with psychiatric disorders. *BioRxiv*, 257311. <https://doi.org/10.1101/257311>

Wray, N. R., Ripke, S., Mattheisen, M., Trzaskowski, M., Byrne, E. M., Abdellaoui, A., Adams, M. J., Agerbo, E., Air, T. M., Andlauer, T. M. F., Bacanu, S.-A., Bækvad-Hansen, M., Beekman, A. F. T., Bigdeli, T. B., Binder, E. B., Blackwood, D. R. H., Bryois, J., Buttenschøn, H. N., Bybjerg-

Grauholm, J., ... Sullivan, P. F. (2018). Genome-wide association analyses identify 44 risk variants and refine the genetic architecture of major depression. *Nature Genetics*, 50(5), 668–681. <https://doi.org/10.1038/s41588-018-0090-3>

Zhou, W., Nielsen, J. B., Fritsche, L. G., Dey, R., Gabrielsen, M. E., Wolford, B. N., LeFaive, J., VandeHaar, P., Gagliano, S. A., Gifford, A., Bastarache, L. A., Wei, W.-Q., Denny, J. C., Lin, M., Hveem, K., Kang, H. M., Abecasis, G. R., Willer, C. J., & Lee, S. (2018). Efficiently controlling for case-control imbalance and sample relatedness in large-scale genetic association studies. *Nature Genetics*, 50(9), 1335–1341. <https://doi.org/10.1038/s41588-018-0184-y>
